# Supplementary material for: GRIPP2 reporting checklists: tools to improve reporting of patient and public involvement in research
Source: PubMed Central journal article supplement — BMJ. 2017 Aug 2;358:j3453. doi: 10.1136/bmj.j3453 (PMC5539518; doi:10.1136/bmj.j3453), 2017-08-02
Supplement: stas033934.ww2.pdf [file stas033934.ww2.pdf]

## Appendix 2: Consensus meeting outcomes

| Item                                                                                                                      | Outcome of discussion                                                                                                                                                         |
|---------------------------------------------------------------------------------------------------------------------------|-------------------------------------------------------------------------------------------------------------------------------------------------------------------------------|
| Q2b: Definition: Report how your definition links to those provided by other comparable studies                           | Q2b: 3 groups agreed to keep the question in and 1 group decided that it could be absorbed into 2a. It was agreed that this item be included but rewording discussed further. |
| Q2c: Concepts and theory development: Report the way in which PPI is being conceptualised                                 | All 4 groups agreed this was similar to 2d and therefore should be absorbed into 2d.                                                                                          |
| Q2d: Concepts and theory development: Report any conceptual or theoretical models, or influences, used in the study       | Q2d: All 4 groups agreed this should be included.                                                                                                                             |
| Methods: economic assessment Q6a: If applicable, report the method used for an economic assessment of PPI                 | Q6a: All 4 groups agreed this item be included.                                                                                                                               |
| Results: Q7e (ii): If applicable, report any testing of conceptual or theoretical models                                  | Q7e (ii): 3 groups agreed to keep in and 1 group decided that was an overlap with 7 (i) and the word testing was questioned.                                                  |
| Discussion: Q8c: Definition: Comment on the definition of PPI used in the study and whether you would suggest any changes | Q8c: 3 groups agreed to keep in and 1 group decided there was an overlap with Q8d.                                                                                            |
