# Supplementary material for: GRIPP2 reporting checklists: tools to improve reporting of patient and public involvement in research
Source: PubMed Central journal article supplement — BMJ. 2017 Aug 2;358:j3453. doi: 10.1136/bmj.j3453 (PMC5539518; doi:10.1136/bmj.j3453), 2017-08-02
Supplement: stas033934.ww4.pdf [file stas033934.ww4.pdf]

#### Appendix 4: Results of the Delphi Survey for GRIPP2 short form

| Section and Topic             | Item                                                                                                                                                 | Round 1<br>Median Scores (IQR) | Round 2<br>Median Scores (IQR) | Round 3<br>Median Scores (IQR)  |
|-------------------------------|------------------------------------------------------------------------------------------------------------------------------------------------------|--------------------------------|--------------------------------|---------------------------------|
| 1. Aims                       | Report the aim of PPI in the study                                                                                                                   | N/A                            | 9.0<br>(9.0, 10.0)             | 9.0 <sup>v</sup><br>(9.0, 10.0) |
| 2. Methods                    | Provide a clear description of methods used for PPI in the study                                                                                     | N/A                            | 9.0<br>(9.0, 9.0)              | 9.0 <sup>v</sup><br>(9.0, 9.0)  |
| 3. Study Results              | Outcomes: Report the results of PPI in the study, including both positive and negative outcomes                                                      | N/A                            | 9.0<br>(9.0, 10.0)             | 9.0 <sup>v</sup><br>(9.0, 10.0) |
| 4. Discussion and conclusions | Outcomes: Comment on the extent to which PPI influenced the study overall. Describe positive and negative effects                                    | N/A                            | 9.0<br>(9.0, 9.0)              | 9.0 <sup>v</sup><br>(9.0, 9.0)  |
| 5. Critical perspective       | Comment critically on the PPI in the study, reflecting on the things that went well and those that did not, so others can learn from this experience | N/A                            | 9.0<br>(9.0, 9.0)              | 9.0 <sup>v</sup><br>(9.0, 9.0)  |
