# Supplementary figures and images for: GRIPP2 reporting checklists: tools to improve reporting of patient and public involvement in research
Source: PubMed Central journal article supplement — BMJ. 2017 Aug 2;358:j3453. doi: 10.1136/bmj.j3453 (PMC5539518; doi:10.1136/bmj.j3453), 2017-08-02

## Appendix 1: Flow chart of the Delphi Survey

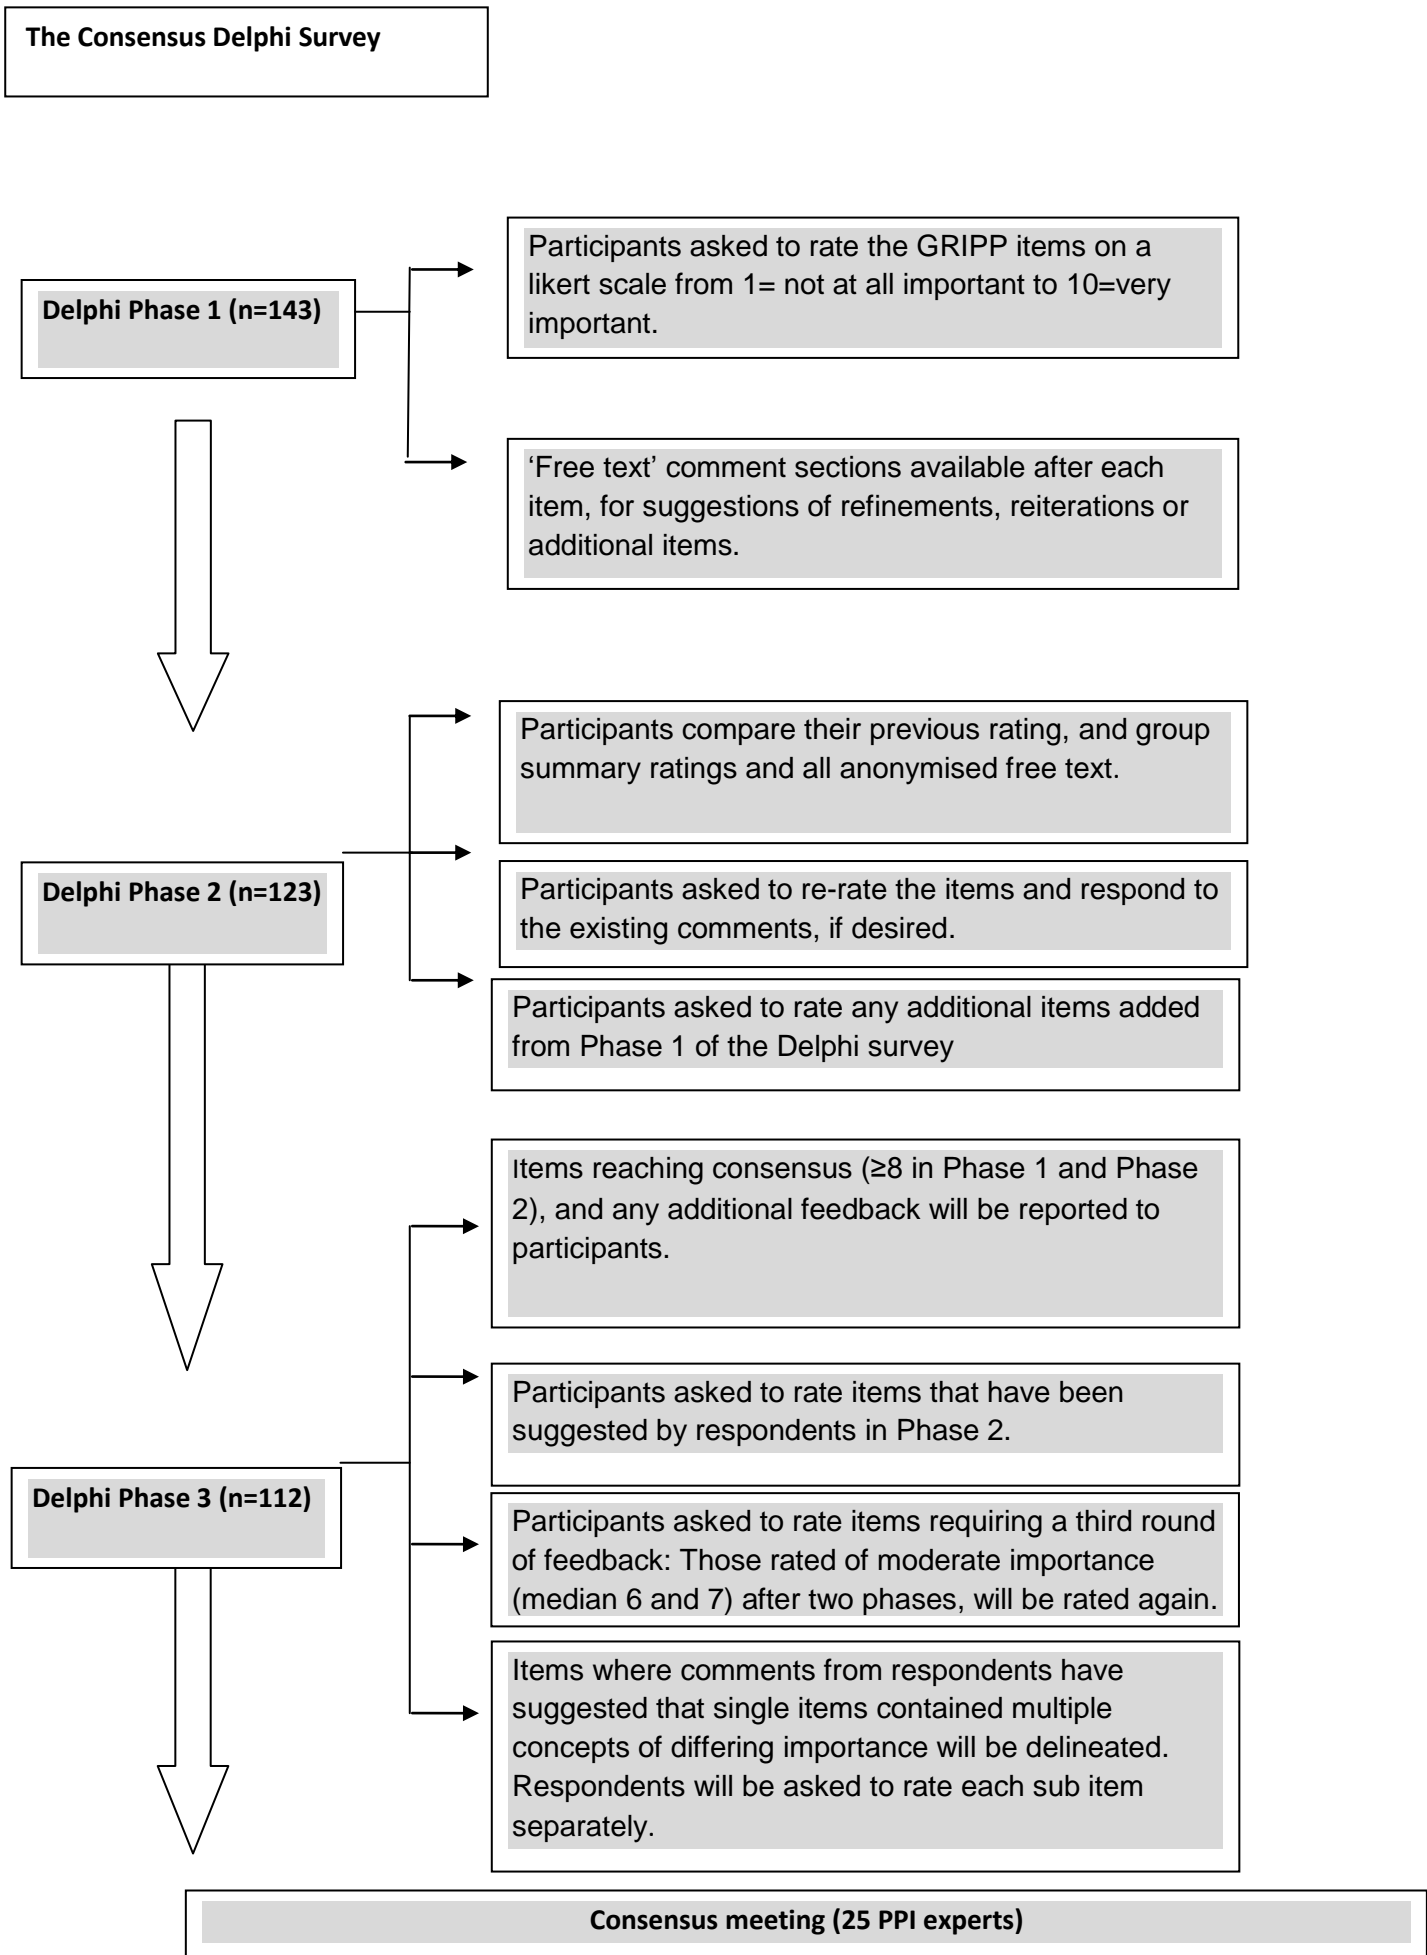

Supplement: stas033934.ww1.pdf [file stas033934.ww1.pdf]
